# Supplementary material for: Exploring the association between khat use and psychiatric symptoms: a systematic review
Source: PubMed Central journal article supplement — BMJ Open. 2022 Jul 25;12(7):e061865. doi: 10.1136/bmjopen-2022-061865 (PMC9328084; doi:10.1136/bmjopen-2022-061865), 2022-07-25
Supplement: bmjopen-2022-061865supp001.pdf [file bmjopen-2022-061865supp001.pdf]

## Supplementary Material 1: Search strategies

| Ovid MEDLINE, Embase and APA PsycInfo | Search Strategy                                                                                                                                                                                                                                                                                                                                                                        |
|---------------------------------------|----------------------------------------------------------------------------------------------------------------------------------------------------------------------------------------------------------------------------------------------------------------------------------------------------------------------------------------------------------------------------------------|
| #1                                    | Khat.ab or khat.ti or qat.ab or qat.ti or qaad.ab or qaad.ti or catha.ab or catha.ti or miraa.ab or miraa.ti or mairungi.ab or mairungi.ti                                                                                                                                                                                                                                             |
| #2                                    | Depression.ab or depression.ti or anxiety.ab or anxiety.ti or bipolar.ab or bipolar.ti or mania.ab or mania.ti or psych*.ab or psych*.ti or schiz*.ab or schiz*.ti or mental.ab or mental.ti or hallucinations.ab or hallucinations.ti or delusions.ab or delusions.ti                                                                                                                 |
| #3                                    | 1 and 2                                                                                                                                                                                                                                                                                                                                                                                |
|                                       |                                                                                                                                                                                                                                                                                                                                                                                        |
| <b>CINAHL</b>                         |                                                                                                                                                                                                                                                                                                                                                                                        |
| #1                                    | TI khat OR AB khat OR TI qat OR AB qat OR TI qaad OR AB qaad OR TI catha OR AB catha OR TI miraa OR AB miraa OR TI mairungi OR AB mairungi                                                                                                                                                                                                                                             |
| #2                                    | TI depression OR AB depression OR TI anxiety OR AB anxiety OR TI bipolar OR AB bipolar OR TI mania OR AB mania OR TI psych* OR AB psych* OR TI schiz* OR AB schiz*                                                                                                                                                                                                                     |
| #3                                    | TI mental OR AB mental OR TI hallucinations OR AB hallucinations OR TI delusions OR AB delusions                                                                                                                                                                                                                                                                                       |
| #4                                    | 2 OR 3                                                                                                                                                                                                                                                                                                                                                                                 |
| #5                                    | 1 AND 4                                                                                                                                                                                                                                                                                                                                                                                |
|                                       |                                                                                                                                                                                                                                                                                                                                                                                        |
| <b>Scopus</b>                         |                                                                                                                                                                                                                                                                                                                                                                                        |
| #1                                    | ( TITLE ( khat ) OR ABS ( khat ) OR TITLE ( qat ) OR ABS ( qat ) OR TITLE ( qaad ) OR ABS ( qaad ) OR TITLE ( catha ) OR ABS ( catha ) OR TITLE ( miraa ) OR ABS ( miraa ) OR TITLE ( mairungi ) OR ABS ( mairungi ) )                                                                                                                                                                 |
| #2                                    | ( TITLE ( depression ) OR ABS ( depression ) OR TITLE ( anxiety ) OR ABS ( anxiety ) OR TITLE ( bipolar ) OR ABS ( bipolar ) OR TITLE ( mania ) OR ABS ( mania ) OR TITLE ( psych* ) OR ABS ( psych* ) OR TITLE ( schiz* ) OR ABS ( schiz* ) OR TITLE ( mental ) OR ABS ( mental ) OR TITLE ( hallucinations ) OR ABS ( hallucinations ) OR TITLE ( delusions ) OR ABS ( delusions ) ) |

|                 |                                                                                                                                                    |
|-----------------|----------------------------------------------------------------------------------------------------------------------------------------------------|
| #3              | 1 AND 2                                                                                                                                            |
|                 |                                                                                                                                                    |
| <b>Proquest</b> |                                                                                                                                                    |
| #1              | ab(khat) OR ti(khat) OR ab(qat) OR ti(qat) OR ab(qaad) OR ti(qaad) OR ab(catha) OR ti(catha) OR ab(miraa) OR ti(miraa)                             |
| #2              | ab(mairungi) OR ti(mairungi)                                                                                                                       |
| #3              | ab(depression) OR ti(depression) OR ab(anxiety) OR ti(anxiety) OR ab(bipolar) OR ti(bipolar) OR ab(mania) OR ti(mania) OR ab(psych*) OR ti(psych*) |
| #4              | ab(schiz*) OR ti(schiz*) OR ab(mental) OR ti(mental) OR ab(hallucinations) OR ti(hallucinations) OR ab(delusions) OR ti(delusions)                 |
| #5              | 1 OR 2                                                                                                                                             |
| #6              | 3 OR 4                                                                                                                                             |
| #7              | 5 AND 6 (limit: full texts only)                                                                                                                   |
