# Supplementary material for: Exploring the association between khat use and psychiatric symptoms: a systematic review
Source: PubMed Central journal article supplement — BMJ Open. 2022 Jul 25;12(7):e061865. doi: 10.1136/bmjopen-2022-061865 (PMC9328084; doi:10.1136/bmjopen-2022-061865), 2022-07-25
Supplement: bmjopen-2022-061865supp002.pdf [file bmjopen-2022-061865supp002.pdf]

## Supplementary Material 2: Summary of Findings Table

| Study                     | Population                                                  | Sample                                                                                          | Criteria for 'Khat User'                                   | Psychiatric Measure* | Results                                                                                                                                                                                                                                               |
|---------------------------|-------------------------------------------------------------|-------------------------------------------------------------------------------------------------|------------------------------------------------------------|----------------------|-------------------------------------------------------------------------------------------------------------------------------------------------------------------------------------------------------------------------------------------------------|
| Ahmed and Emad 1998 [35]  | Somali immigrants living in Liverpool                       | Convenience sample of 52<br>Khat users = 27                                                     | Unspecified                                                | GHQ-28               | - 11/27 khat users experienced psychiatric dysfunction, compared to 9/25 non-users (p=0.72)                                                                                                                                                           |
| Belew et al. 2000 [36]    | Individuals aged 15+ from a specified community in Ethiopia | Random sample of 1200 participants<br>Khat users = 326                                          | Anyone who has chewed khat within the last 30 days         | SRQ                  | - 100/326 khat-users experienced mental distress, compared to 28/554 non-users (OR = 8.31, 5.20-13.31, p=0.00)<br>- 89/294 long-term users (over 2 years) experienced mental distress, compared to 28/554 never-users (OR = 8.14, 5.06-13.17, p=0.00) |
| Numan 2003 [37]           | Yemeni population                                           | Random sample of 800 participants<br>Khat users = 67.9%                                         | Frequent use – 4-6 days a week<br>Heavy use – use everyday | SCL-90               | - No significant differences (at p<0.05) in psychiatric symptoms: obsession-compulsion, depression, anxiety, paranoid ideation, psychoticism<br>- Khat users had less phobic anxiety (37.7% vs 55.5%, p<0.05)                                         |
| Odenwald et al. 2005 [38] | 'General population' of Somalia                             | Random sample of 4854<br>Khat users = 78% of those with psychiatric issues, 4% of those without | Number of bundles in previous week recorded                | CIDI, PANSS          | - More positive screened individuals (mental problems severe enough to prevent employment or household tasks) chewed khat than negative screened individuals (46.6% vs 29.9%, p<0.001)                                                                |
| Deyessa et al. 2008 [39]  | Women of reproductive age in rural Ethiopia                 | Random sample of 3200<br>Khat users = 40%                                                       | At least once per week                                     | CIDI, ICD-10         | - 5.9% of regular users had had a depressive episode in the last 12 months, compared to 3.1% of non-regular users (less than once per month) and 3.6% of non-users<br>- AOR for regular vs non-users is 1.35 (0.92-1.99)                              |

|                           |                                                       |                                                                                                 |                                                                                                |                                       |                                                                                                                                                       |
|---------------------------|-------------------------------------------------------|-------------------------------------------------------------------------------------------------|------------------------------------------------------------------------------------------------|---------------------------------------|-------------------------------------------------------------------------------------------------------------------------------------------------------|
| Odenwald et al. 2009 [40] | Armed combatants in Somali                            | 8124 armed individuals (not random as still in conflict at time of study)<br>Khat users = 36.4% | Anyone who has chewed khat within the last week                                                | CIDI                                  | - 8.9% of khat users experienced paranoid ideation compared to 2.6% of non-users                                                                      |
| Damena et al. 2011 [41]   | Adults in Jimma City, Ethiopia                        | Random sample of 1308<br>Khat users = 38%                                                       | Uses WHO-validated substance abuse questionnaire, but unsure what is classified as 'khat user' | SRQ-20                                | - 49/136 long-term khat chewers experienced mental distress, compared to 108/317 short-term khat chewers (less than two years), and 153/747 non-users |
| Tulloch et al. 2012 [42]  | Adult Somali khat users living in South London        | Secondary data based on 172 eligible Somali mental health patients<br>Khat users = 47%          | Anyone who has chewed khat within the last year                                                | Diagnosis provided by service records | - 28/30 khat users experienced psychosis compared to 2/30 non-users (p<0.001)                                                                         |
| Dessie et al. 2013 [43]   | Students in Ethiopia                                  | Random sample of 413<br>Khat users = 43%                                                        | Anyone who has ever used khat                                                                  | SRQ-20                                | - 59/185 khat users experienced mental distress compared to 34/245 non-users (AOR = 2.23, 1.14-4.35, p<0.05)                                          |
| Fekadu 2014 [44]          | Holy water users from Entoto St Mary Church, Ethiopia | 409 individuals selected using systematic random sampling<br>Daily khat users = 12.7%           | Khat use recorded as 'never' or 'daily', although no indication of the duration of daily usage | BPRS                                  | - 42/53 daily khat-users experienced symptoms of mental illness compared to 208/363 non-users (AOR = 2.85, 1.42-5.70)                                 |
| Widmann et al. 2014 [7]   | Male Somali refugees living in a disadvantaged        | Convenience sample of 33 users and 15 comparable non-users                                      | SDS                                                                                            | CIDI, MINI                            | - 24% of khat users had psychotic symptoms compared to 0% of non-chewers (p=0.044)                                                                    |

|                             |                                                             |                                                                                                          |                                                  |                                                |                                                                                                                                                                                                        |
|-----------------------------|-------------------------------------------------------------|----------------------------------------------------------------------------------------------------------|--------------------------------------------------|------------------------------------------------|--------------------------------------------------------------------------------------------------------------------------------------------------------------------------------------------------------|
|                             | urban settlement in Kenya                                   | Khat users = 69%                                                                                         |                                                  |                                                |                                                                                                                                                                                                        |
| Dachew et al. 2015 [45]     | Undergraduate students from Gondar University, Ethiopia     | 872 patients selected using stratified, random sampling<br>Current khat users = 16%                      | Questionnaire identifying 'current use'          | SRQ-20                                         | - 63/114 current khat users had mental distress, compared to 279/722 non-users (OR=1.96, 1.32-2.92, p=0.02)                                                                                            |
| Soboka et al. 2015 [46]     | HIV patients at a specified facility in South West Ethiopia | All eligible adults invited to participate<br>Sample of 389<br>Khat users = 93                           | Anyone who has chewed khat within the last month | K-6                                            | - 52/93 khat-users experienced psychological distress, compared to 124/296 non-users (OR = 1.76, 1.10-2.82)                                                                                            |
| Zenebe et al. 2015 [47]     | Psychiatric outpatients in Ethiopia                         | 365 adult psychiatric outpatients of a specified hospital within 2-week study period<br>Khat use = 64.4% | Anyone who has used khat within the last 30 days | Psychiatric diagnosis from psychiatric records | - 58/235 khat users had a major depressive disorder compared to 46/130 non-users (AOR = 1.43, 0.74-2.77)<br>- 97/235 khat users had schizophrenia compared to 34/130 non-users (AOR = 0.87, 0.45-1.68) |
| El-Setouhy et al. 2016 [48] | Jazan region of Saudi Arabia                                | Volunteer sample of 70 males<br>Khat dependent = 52.2%                                                   | SDS                                              | Q16                                            | - 13/35 dependent users felt depressed compared to 7/32 non-dependent users (OR = 2.30, 0.7-6.8)<br>- 20/35 dependent users felt anxious compared to 10/32 non-dependent users (OR = 3.50, 1.2-10.0)   |
| Hersi et al. 2017 [49]      | Students in Somaliland                                      | Stratified random sample of 570<br>Khat users = 19%                                                      | Use in last 12 months                            | SRQ-20                                         | - 32% of khat users experienced psychological distress, compared to 17% of non-users (AOR = 2.87, 1.26-6.56)                                                                                           |
| Hunduma et al. 2017 [50]    | Adults in Ethiopia                                          | Random sample of 968<br>Khat users = 48%                                                                 | Khat use in last 3 months                        | SRQ-20                                         | - 86/434 khat users had a common mental disorder, compared to 48/467 non-users (OR = 2.16, 1.47-3.16)                                                                                                  |

|                              |                                                                       |                                                                                |                                                                  |               |                                                                                                                                                                                                                                                                                      |
|------------------------------|-----------------------------------------------------------------------|--------------------------------------------------------------------------------|------------------------------------------------------------------|---------------|--------------------------------------------------------------------------------------------------------------------------------------------------------------------------------------------------------------------------------------------------------------------------------------|
| Kerebih et al. 2017 [51]     | Medical students in Ethiopia                                          | Stratified random sample of 305<br>Khat users = 9%                             | Anyone who has ever used khat                                    | SRQ-20        | - 18/26 khat users experienced mental distress compared to 84/264 non-users (AOR = 6.91, 1.88-25.42, p=0.004)                                                                                                                                                                        |
| Mossie et al. 2016 [52]      | Adults in Ethiopia                                                    | Random sample of 650<br>Khat users = 34%                                       | Khat use within the last 30 days                                 | BDI           | - 104/200 khat users had depression compared to 67/390 non-users (AOR = 10.07, 5.56-18.25)                                                                                                                                                                                           |
| Soboka et al. 2017 [53]      | Adults with hypertension at a specified clinic in South West Ethiopia | All eligible adults invited to participate<br>Sample of 396<br>Khat users = 79 | Anyone who has chewed khat within the last month                 | K-6           | - 27/72 current khat-users experienced psychological distress, compared to 98/324 non-users                                                                                                                                                                                          |
| Tariku et al. 2017 [54]      | Students at a health sciences college in Ethiopia                     | Stratified random sample of 317<br>Khat users = 13%                            | Anyone who has ever used khat                                    | Not specified | - 19/40 khat users experienced mental distress compared to 71/168 non-users (AOR = 2.29, 1.04-5.04)                                                                                                                                                                                  |
| Wondemagegn et al. 2017 [55] | Adolescents and adults in Nekemte town, West Ethiopia                 | Random sample of 359 participants<br>Khat users = 49%                          | Anyone who has chewed khat within the last 30 days               | DSM-IV        | - 108/172 users experienced depression compared to 15/182 non-users (AOR = 25.36, 12.13-53.05, p=0.000)<br>- 79/172 users experienced anxiety compared to 26/182 non-users (AOR = 5.49, 3.04-9.96, p=0.000)                                                                          |
| Yeshaw and Mossie 2017 [56]  | Staff of Jimma University, Ethiopia                                   | Random sample of 363<br>Khat users = 41%                                       | Anyone who has ever used khat                                    | DASS-21       | - 54/145 khat users had depression compared to 27/209 non-users (AOR = 4.99, 2.57-9.69)<br>- 43/145 khat users had anxiety compared to 25/209 non-users (AOR = 2.94, 1.52-5.66)<br>- 59/145 khat users had psychological stress compared to 41/209 non-users (AOR = 2.78, 1.49-5.21) |
| Bedaso et al. 2018 [57]      | Prisoners in Ethiopia                                                 | Random sample of 335<br>Khat users = 14%                                       | Unspecified, but appears to be chewing khat before incarceration | PHQ-9         | - 36/48 khat users had depression, compared to 153/287 non-users (AOR = 2.48, 1.05-5.86, p=0.039)                                                                                                                                                                                    |
| Adraro et al. 2019 [58]      | Prisoners in Ethiopia                                                 | Random sample of 300<br>Khat users = 46%                                       | Anyone who has ever used khat                                    | SRQ-20        | - 119/139 khat users experienced mental distress, compared to 69/161 non-users (AOR = 4.33, 2.02-9.27, p<0.001)                                                                                                                                                                      |

|                           |                                           |                                                                 |                                                                      |         |                                                                                                                                                                                                                                                                                                                                                     |
|---------------------------|-------------------------------------------|-----------------------------------------------------------------|----------------------------------------------------------------------|---------|-----------------------------------------------------------------------------------------------------------------------------------------------------------------------------------------------------------------------------------------------------------------------------------------------------------------------------------------------------|
| Ongeri et al. 2019 [59]   | Khat-growing regions of Kenya             | Random sample of 831 individuals aged 10+<br>Khat users = 36.8% | Unspecified                                                          | PSQ     | - 18.6% of khat users experienced at least one psychotic symptom compared to 15.6% of non-users (p=0.26)                                                                                                                                                                                                                                            |
| Atnafie et al. 2020 [60]  | Khat chewers in Amhara region of Ethiopia | Convenience sample of 508 participants<br>Khat dependent = 43%  | SDS                                                                  | DASS-21 | - 33/207 khat-dependent users experienced stress compared to 57/271 non-dependent users (AOR = 1.70, 0.98-2.95)<br>- 146/207 khat-dependent users experienced anxiety compared to 133/271 non-dependent users (AOR = 2.47, 1.57-3.81)<br>- 41/207 khat-dependent users experienced depression compared to 80/271 non-users (AOR = 6.28, 1.67-23.61) |
| Hajure et al. 2020 [61]   | Healthcare providers in Ethiopia          | Convenience sample of 127<br>Khat users = 45%                   | Khat use in last three months                                        | IES-R   | - 37/57 khat users experienced psychological stress, compared to 14/70 non-users (AOR = 5.74, 1.83-18.1, p<0.001)                                                                                                                                                                                                                                   |
| Hambisa et al. 2020 [62]  | Students in Ethiopia                      | Random sample of 1022<br>Khat users = 24%                       | Khat use within last month                                           | BDI     | - 84/241 khat users had depressive symptoms compared to 190/781 non-users (OR = 1.60, 1.22-2.27)                                                                                                                                                                                                                                                    |
| Kelemu et al. 2020 [63]   | Students in Ethiopia                      | Random sample of 404<br>Khat users = 27%                        | Anyone who has ever used khat                                        | SRQ-20  | - 70/111 khat users experienced mental distress, compared to 145/293 non-users (AOR = 3.09, 1.74-5.50)                                                                                                                                                                                                                                              |
| Mekuriaw et al. 2020 [64] | Pregnant women in Ethiopia                | Random sample of 845<br>Khat users = 11%                        | Investigates usage but unclear what quantifies a 'current khat user' | SRQ-20  | - 39/71 khat users experienced mental distress, compared to 149/647 non-users (AOR = 3.57, 2.06-6.18, p=0.001)                                                                                                                                                                                                                                      |
| Yitayih et al. 2020 [65]  | Prisoners in a correctional               | Random sample of 336<br>Khat users = 138                        | DAST-10                                                              | PCL:SV  | - 32/138 khat users met the criteria for psychopathy, compared to 9/191 non-users                                                                                                                                                                                                                                                                   |

|                             |                                                |                                                                    |                                                                                       |         |                                                                                                                                                                                                                                                                                    |
|-----------------------------|------------------------------------------------|--------------------------------------------------------------------|---------------------------------------------------------------------------------------|---------|------------------------------------------------------------------------------------------------------------------------------------------------------------------------------------------------------------------------------------------------------------------------------------|
|                             | institution in Jimma, Ethiopia                 |                                                                    |                                                                                       |         | - 16/138 khat users had mental illness, compared to 15/191 non-users                                                                                                                                                                                                               |
| Haile and Sahile, 2021 [66] | Adult primary healthcare attendees in Ethiopia | Stratified and systematic random sample of 384<br>Khat users = 39% | Unspecified                                                                           | PHQ-9   | - 67/108 khat users had depressive symptoms, compared to 40/276 non-users (AOR = 5.43, 2.55-11.56, p<0.01)                                                                                                                                                                         |
| Hambisa et al. 2021 [67]    | Hospitalised patients in Ethiopia              | Systematic sample of 337<br>Khat users = 18%                       | Unspecified; discusses 'current khat use' and 'khat use in the previous three months' | K10     | - 49/59 khat users experienced psychological distress, compared to 146/278 non-users (AOR = 4.16, 1.67-10.35)                                                                                                                                                                      |
| Melaku et al. 2021 [68]     | Medical students in Ethiopia                   | Systematic random sample of 260<br>Khat users = 22%                | Anyone who has ever used khat                                                         | DASS-21 | - 37/56 khat users had depression, compared to 99/204 non-users (OR = 2.07, 1.11-3.83)<br>- 41/56 khat users had anxiety, compared to 117/204 non-users (OR = 2.03, 1.06-3.91)<br>- 30/56 khat users had psychological stress, compared to 75/204 non-users (OR = 1.99, 1.09-3.61) |

\*List of abbreviated screening tools: GHQ-28 (General Health Questionnaire-28, for mental disorders), SRQ-20 (Self-Reporting Questionnaire - 20 items, for mental distress), SCL-90 (Symptom Checklist - 90 items, for psychological symptoms), CIDI (Composite International Diagnostic Interview - for psychiatric disorders), PANSS (Positive and Negative Syndrome Scale - for schizophrenia), ICD-10 (International Classification of Diseases, 10th revision), BPRS (Brief Psychiatric Rating Scale - for depression, anxiety and hallucinations), SDS (Severity of Dependence Scale), MINI (Mini International Psychiatric Review), K-6 (Kessler Psychological Distress Scale - 6 questions), Q16 (Questionnaire 16 for neurotoxic symptoms), BDI (Beck's Depression Inventory), DSM-IV (Diagnostic and Statistical Manual of Mental Disorders, 4th edition), DASS-21 (The Depression, Anxiety and Stress Scale - 21 Items), PHQ-9 (Patient Health Questionnaire - 9 items, for depression), PSQ (Psychosis Screening Questionnaire), IES-R (Impacts of Events Scale - Revised), DAST-10 (Drug Abuse Screening Test-10), PCL:SV (Psychopathy Checklist: Screening Version), K10 (Kessler Psychological Distress Scale - 10 questions)
