# Supplementary material for: Exploring the association between khat use and psychiatric symptoms: a systematic review
Source: PubMed Central journal article supplement — BMJ Open. 2022 Jul 25;12(7):e061865. doi: 10.1136/bmjopen-2022-061865 (PMC9328084; doi:10.1136/bmjopen-2022-061865), 2022-07-25
Supplement: bmjopen-2022-061865supp003.pdf [file bmjopen-2022-061865supp003.pdf]

## Supplementary Material 3: Quality of assessment of primary studies using Newcastle-Ottawa scale [17-18].

| Study                | Selection (/5) | Comparability (/2) | Outcome (/3) | Overall Score (/10) | Comments                                                                                                                                                                                                                                                                                                                                                                                                                                             |
|----------------------|----------------|--------------------|--------------|---------------------|------------------------------------------------------------------------------------------------------------------------------------------------------------------------------------------------------------------------------------------------------------------------------------------------------------------------------------------------------------------------------------------------------------------------------------------------------|
| Ahmed and Emad 1998  | 1              | 2                  | 1            | 4                   | <ul style="list-style-type: none"> <li>- Non-random sample</li> <li>- No justification of sample size</li> <li>- 100% response rate</li> <li>- Questionnaire described in insufficient detail no definition of khat use</li> <li>- No significant differences in baseline characteristics between khat users and non-users</li> <li>- Uses self-report</li> <li>- No details of statistical analysis and no confidence intervals provided</li> </ul> |
| Belew et al. 2000    | 3              | 2                  | 2            | 7                   | <ul style="list-style-type: none"> <li>- Insufficient details of non-responders; no baseline characteristics provided</li> <li>- Questionnaire described in limited detail but methods do define current, past and never khat use</li> </ul>                                                                                                                                                                                                         |
| Numan 2003           | 3              | 1                  | 1            | 5                   | <ul style="list-style-type: none"> <li>- Sample size not justified</li> <li>- Eight non-respondents excluded because of incomplete data</li> <li>- Non-validated but described method of khat usage data collection</li> <li>- Only controlled variable seems to be Yemeni nationality</li> <li>- No confidence intervals included</li> </ul>                                                                                                        |
| Odenwald et al. 2005 | 3              | 2                  | 2            | 7                   | <ul style="list-style-type: none"> <li>- Sample size not justified</li> <li>- No details of non-responders</li> <li>- Non-validated but described method of khat usage data</li> </ul>                                                                                                                                                                                                                                                               |

|                      |   |   |   |   |                                                                                                                                                                                                                                                                                                             |
|----------------------|---|---|---|---|-------------------------------------------------------------------------------------------------------------------------------------------------------------------------------------------------------------------------------------------------------------------------------------------------------------|
|                      |   |   |   |   | collection<br>- Uses clinical interviews<br>- No confidence intervals included                                                                                                                                                                                                                              |
| Deyessa et al. 2008  | 3 | 2 | 3 | 8 | - Providers reasons for non-responders but not characteristics<br>- Non-validated but described method of khat usage data collection<br>- Clinical interview                                                                                                                                                |
| Odenwald et al. 2009 | 2 | 2 | 2 | 6 | - Sample size not justified<br>- No details of non-responders<br>- Non-validated but described method of khat usage data collection<br>- Uses self-report                                                                                                                                                   |
| Damena et al. 2011   | 4 | 1 | 1 | 6 | - Providers reasons for non-responders but not characteristics<br>- Uses WHO-validated khat use measurement tool despite definition of 'khat user' being unclear within the study<br>- Only controlled variable seems to be region (Jimma City)<br>- Uses self-report<br>- No confidence intervals included |
| Tulloch et al. 2012  | 4 | 2 | 2 | 8 | - Entire eligible sample used<br>- Missing information discussed<br>- Non-validated but described method of khat usage data collection<br>- No confidence intervals included                                                                                                                                |
| Dessie et al. 2013   | 3 | 2 | 2 | 7 | - No details of non-responders<br>- Non-validated but described method of khat usage data collection                                                                                                                                                                                                        |

|                        |   |   |   |   |                                                                                                                                                                                                         |
|------------------------|---|---|---|---|---------------------------------------------------------------------------------------------------------------------------------------------------------------------------------------------------------|
|                        |   |   |   |   | - Uses self report                                                                                                                                                                                      |
| Fekadu 2014            | 2 | 2 | 2 | 6 | - No details of non-responders<br>- Khat usage data collection described insufficiently: 'daily' or 'never'<br>- Uses self-report                                                                       |
| Widmann et al. 2014    | 2 | 2 | 3 | 7 | - Opportunity sample<br>- Sample size not justified<br>- No details of non-responders<br>- Clinical interview                                                                                           |
| Dachew et al. 2015     | 2 | 2 | 2 | 6 | - Justification of sample size unsatisfactory<br>- No details of non-responders<br>- Non-validated but described method of khat usage data collection<br>- Uses self-report                             |
| Soboka et al. 2015     | 3 | 2 | 2 | 7 | - All eligible participants invited to participate<br>- Limited description of non-responders (gender only)<br>- Non-validated but described method of khat usage data collection<br>- Uses self-report |
| Zenebe et al. 2015     | 3 | 2 | 3 | 8 | - No details of non-responders<br>- Non-validated but described method of khat usage data collection<br>- Medical records used                                                                          |
| El-Setouhy et al. 2016 | 4 | 2 | 2 | 8 | - Volunteer sample; no non-responders<br>- Uses self-report                                                                                                                                             |
| Hersi et al. 2017      | 3 | 2 | 2 | 7 | - No details of non-responders<br>- Non-validated but described method of khat usage data                                                                                                               |

|                         |   |   |   |   |                                                                                                                                                                                                                                                                                   |
|-------------------------|---|---|---|---|-----------------------------------------------------------------------------------------------------------------------------------------------------------------------------------------------------------------------------------------------------------------------------------|
|                         |   |   |   |   | collection<br>- Uses self-report                                                                                                                                                                                                                                                  |
| Hunduma et al. 2017     | 3 | 2 | 2 | 7 | - No details of non-responders<br>- Non-validated but described method of khat usage data collection<br>- Uses self-report                                                                                                                                                        |
| Kerebih et al. 2017     | 3 | 2 | 2 | 7 | - No details of non-responders<br>- Non-validated but described method of khat usage data collection<br>- Uses self-report                                                                                                                                                        |
| Mossie et al. 2016      | 3 | 2 | 2 | 7 | - No details of non-responders<br>- Non-validated but described method of khat usage data collection<br>- Uses self-report                                                                                                                                                        |
| Soboka et al. 2017      | 2 | 2 | 2 | 6 | - Invited all eligible participants<br>- Does not discuss whether sample size is large enough for conclusions to be drawn<br>- No details of non-responders<br>- Non-validated but described method of khat usage data collection<br>- Unclear if all variables are self-reported |
| Tariku et al. 2017      | 3 | 2 | 2 | 7 | - No details of non-responders<br>- Non-validated but described method of khat usage data collection<br>- Uses self report                                                                                                                                                        |
| Wondemagegn et al. 2017 | 3 | 1 | 3 | 7 | - No details of non-responders<br>- Non-validated but described method of khat usage data collection                                                                                                                                                                              |

|                        |   |   |   |   |                                                                                                                                                           |
|------------------------|---|---|---|---|-----------------------------------------------------------------------------------------------------------------------------------------------------------|
|                        |   |   |   |   | - Only one community studied but no other controlled variables                                                                                            |
| Yeshaw and Mossie 2017 | 2 | 2 | 2 | 6 | - Sample size not justified<br>- No details of non-responders<br>- Non-validated but described method of khat usage data collection<br>- Uses self-report |
| Bedaso et al. 2018     | 3 | 2 | 2 | 8 | - 100% response rate<br>- Limited description of khat usage data collection<br>- Uses self-report                                                         |
| Adraro et al. 2019     | 3 | 2 | 2 | 7 | - No details of non-responders<br>- Non-validated but described method of khat usage data collection<br>- Uses self-report                                |
| Ongeri et al. 2019     | 2 | 2 | 2 | 6 | - No details of non-responders<br>- No description of what quantifies a 'current khat user'<br>- Uses self-report                                         |
| Atnafie et al. 2020    | 3 | 2 | 2 | 7 | - No details of non-responders<br>- Non-validated but described method of khat usage data collection<br>- Uses self-report                                |
| Hajure et al. 2020     | 3 | 2 | 2 | 7 | - No details of non-responders<br>- Non-validated but described method of khat usage data collection<br>- Uses self-report                                |
| Hambisa et al. 2020    | 3 | 2 | 2 | 7 | - No details of non-responders                                                                                                                            |

|                       |   |   |   |   |                                                                                                                                                                                                                 |
|-----------------------|---|---|---|---|-----------------------------------------------------------------------------------------------------------------------------------------------------------------------------------------------------------------|
|                       |   |   |   |   | <ul style="list-style-type: none"> <li>- Non-validated but described method of khat usage data collection</li> <li>- Uses self-report</li> </ul>                                                                |
| Kelemu et al. 2020    | 3 | 2 | 2 | 7 | <ul style="list-style-type: none"> <li>- No details of non-responders</li> <li>- Non-validated but described method of khat usage data collection</li> <li>- Uses self-report</li> </ul>                        |
| Mekuriaw et al. 2020  | 3 | 2 | 2 | 7 | <ul style="list-style-type: none"> <li>- No details of non-responders</li> <li>- Non-validated but described method of khat usage data collection</li> <li>- Uses self-report</li> </ul>                        |
| Yitayih et al. 2020   | 4 | 2 | 2 | 8 | <ul style="list-style-type: none"> <li>- Provides reasons for non-responders but not characteristics</li> <li>- Uses DAST-10 for khat abuse</li> <li>-Uses self-report</li> </ul>                               |
| Haile and Sahile 2021 | 3 | 2 | 2 | 7 | <ul style="list-style-type: none"> <li>- 100% response rate</li> <li>- No description of what quantifies a 'current khat user'</li> <li>- Uses self-report</li> </ul>                                           |
| Hambisa et al. 2021   | 2 | 2 | 2 | 6 | <ul style="list-style-type: none"> <li>- Providers reasons for non-responders but not characteristics</li> <li>- No description of what quantifies a 'current khat user'</li> <li>- Uses self-report</li> </ul> |
| Melaku et al. 2021    | 3 | 2 | 2 | 7 | <ul style="list-style-type: none"> <li>- No details of non-responders</li> <li>- Non-validated but described method of khat usage data collection</li> <li>- Uses self-report</li> </ul>                        |
