# Supplementary material for: Exploring the association between khat use and psychiatric symptoms: a systematic review
Source: PubMed Central journal article supplement — BMJ Open. 2022 Jul 25;12(7):e061865. doi: 10.1136/bmjopen-2022-061865 (PMC9328084; doi:10.1136/bmjopen-2022-061865), 2022-07-25
Supplement: bmjopen-2022-061865supp004.pdf [file bmjopen-2022-061865supp004.pdf]

## Supplementary Material 4: Sensitivity Analysis

| Study Excluded          | Odds Ratio | 95% CIs   | I <sup>2</sup> Value (%) | P-Value  |
|-------------------------|------------|-----------|--------------------------|----------|
| Depression              |            |           |                          |          |
| Atnafie et al. 2020     | 2.28       | 1.81-2.87 | 91                       | <0.00001 |
| Bedaso et al. 2018      | 2.21       | 1.75-2.79 | 92                       | <0.00001 |
| Deyessa et al. 2008     | 2.23       | 1.76-2.82 | 92                       | <0.00001 |
| El-Setouhy et al. 2016  | 2.22       | 1.76-2.80 | 92                       | <0.00001 |
| Haile and Sahile 2021   | 2.14       | 1.71-2.69 | 91                       | <0.00001 |
| Hambisa et al 2020      | 2.24       | 1.77-2.84 | 92                       | <0.00001 |
| Melaku et al. 2021      | 2.22       | 1.76-2.81 | 92                       | <0.00001 |
| Mossie et al. 2016      | 2.17       | 1.73-2.73 | 91                       | <0.00001 |
| Numan 2003              | 2.27       | 1.80-2.87 | 91                       | <0.00001 |
| Wondemagegn et al. 2017 | 2.11       | 1.69-2.64 | 91                       | <0.00001 |
| Yeshaw and Mossie 2017  | 2.19       | 1.74-2.76 | 92                       | <0.00001 |
| Zenebe et al. 2015      | 2.28       | 1.81-2.87 | 91                       | <0.00001 |
| Anxiety                 |            |           |                          |          |
| Atnafie et al. 2020     | 2.22       | 1.75-2.80 | 92                       | <0.00001 |
| El-Setouhy et al. 2016  | 2.21       | 1.75-2.79 | 92                       | <0.00001 |
| Melaku et al. 2021      | 2.22       | 1.76-2.81 | 92                       | <0.00001 |
| Numan 2003              | 2.29       | 1.83-2.86 | 91                       | <0.00001 |
| Numan 2003              | 2.26       | 1.79-2.86 | 92                       | <0.00001 |
| Numan 2003              | 2.27       | 1.80-2.87 | 91                       | <0.00001 |
| Wondemagegn et al. 2017 | 2.18       | 1.73-2.74 | 91                       | <0.00001 |
| Yeshaw and Mossie 2017  | 2.20       | 1.75-2.78 | 92                       | <0.00001 |
| Psychological Distress  |            |           |                          |          |
| Adraro et al. 2019      | 2.16       | 1.72-2.71 | 91                       | <0.00001 |

|                                            |      |           |    |          |
|--------------------------------------------|------|-----------|----|----------|
| Atnafie et al. 2020                        | 2.27 | 1.80-2.87 | 92 | <0.00001 |
| Belew et al. 2000                          | 2.15 | 1.72-2.69 | 91 | <0.00001 |
| Dachew et al. 2015                         | 2.23 | 1.76-2.82 | 92 | <0.00001 |
| Damena et al. 2011                         | 2.26 | 1.78-2.85 | 92 | <0.00001 |
| Dessie et al. 2013                         | 2.21 | 1.75-2.79 | 92 | <0.00001 |
| Hajure et al. 2020                         | 2.17 | 1.72-2.73 | 92 | <0.00001 |
| Hambisa et al. 2021                        | 2.19 | 1.74-2.76 | 92 | <0.00001 |
| Hersi et al. 2017                          | 2.22 | 1.75-2.80 | 92 | <0.00001 |
| Kelemu et al. 2020                         | 2.23 | 1.77-2.82 | 92 | <0.00001 |
| Kerebih et al. 2017                        | 2.19 | 1.74-2.76 | 92 | <0.00001 |
| Mekuriaw et al. 2020                       | 2.19 | 1.74-2.76 | 92 | <0.00001 |
| Melaku et al. 2021                         | 2.23 | 1.76-2.81 | 92 | <0.00001 |
| Soboka et al. 2015                         | 2.23 | 1.77-2.82 | 92 | <0.00001 |
| Soboka et al. 2017                         | 2.24 | 1.78-2.83 | 92 | <0.00001 |
| Tariku et al. 2017                         | 2.25 | 1.78-2.84 | 92 | <0.00001 |
| Yeshaw and Mossie et al. 2017              | 2.21 | 1.75-2.79 | 92 | <0.00001 |
| Psychotic symptoms/disorders               |      |           |    |          |
| Numan 2003                                 | 2.26 | 1.78-2.86 | 92 | <0.00001 |
| Numan 2003                                 | 2.27 | 1.80-2.87 | 91 | <0.00001 |
| Odenwald et al. 2009                       | 2.27 | 1.80-2.87 | 91 | <0.00001 |
| Ongeri et al. 2019                         | 2.25 | 1.78-2.85 | 92 | <0.00001 |
| Tulloch et al. 2012                        | 2.14 | 1.70-2.68 | 91 | <0.00001 |
| Widmann et al. 2014                        | 2.20 | 1.75-2.77 | 92 | <0.00001 |
| Zenebe et al. 2015                         | 2.23 | 1.76-2.82 | 92 | <0.00001 |
| Psychopathy                                |      |           |    |          |
| Yitayih et al. 2020                        | 2.18 | 1.73-2.74 | 92 | <0.00001 |
| Unspecified psychiatric symptoms/disorders |      |           |    |          |

|                      |      |           |    |          |
|----------------------|------|-----------|----|----------|
| Ahmed and Emad 1998  | 2.24 | 1.78-2.83 | 92 | <0.00001 |
| Fedaku et al. 2014   | 2.21 | 1.75-2.79 | 92 | <0.00001 |
| Hunduma et al. 2017  | 2.22 | 1.76-2.81 | 92 | <0.00001 |
| Odenwald et al. 2005 | 2.23 | 1.76-2.82 | 92 | <0.00001 |
| Yitayih et al. 2020  | 2.24 | 1.77-2.82 | 92 | <0.00001 |
